# Supplementary material
Source: publisher figshare collection journal article supplement (https://frontiersin.figshare.com/ndownloader/files/24496022)
Supplement: Supplementary file 1 [file 24496022]

Early Career Research* (ECR) involvement in the Marine Ecosystem Assessment for the Southern Ocean (MEASO) initiative

**MEASO 2018 conference attendees**

| **Continent** | **Total number of people** | **Number of ECRs** |
| --- | --- | --- |
| North America | 13 | 2 |
| South America | 8 | 4 |
| Asia | 21 | 11 |
| Australia / NZ | 100 | 30 |

**ECR and Mid-Career Researcher** (MCRs) authors on the MEASO special issue*****

| **Country** | **Total number of people** | **Number of ECRs** | **%ECRs** | **Number of MCRs** | **%MCRs** |
| --- | --- | --- | --- | --- | --- |
| Argentina | 6 | 1 | 16.7 | 0 | 0.0 |
| Australia | 51 | 17 | 33.3 | 6 | 11.8 |
| Belgium | 4 | 0 | 0.0 | 1 | 25.0 |
| Brazil | 4 | 2 | 50.0 | 1 | 25.0 |
| Canada | 3 | 0 | 0.0 | 1 | 33.3 |
| Chile | 4 | 1 | 25.0 | 2 | 50.0 |
| France | 9 | 3 | 33.3 |  | 0.0 |
| Germany | 12 | 1 | 8.3 | 3 | 25.0 |
| Italy | 4 | 0 | 0.0 | 0 | 0.0 |
| Japan | 2 | 0 | 0.0 | 0 | 0.0 |
| New Zealand | 7 | 4 | 57.1 | 0 | 0.0 |
| Norway | 3 | 0 | 0.0 | 1 | 33.3 |
| Portugal | 1 | 0 | 0.0 | 0 | 0.0 |
| South Africa | 6 | 3 | 50.0 | 2 | 33.3 |
| Spain | 2 | 0 | 0.0 | 1 | 50.0 |
| UK | 25 | 4 | 16.0 | 1 | 4.0 |
| USA | 22 | 3 | 13.6 | 4 | 18.2 |

*ECRs defined as 0-5 years since their terminal degree

**MCRs defined as 5-10 years since their terminal degree

***Figures at the time of writing (August 2020)
